# Supplementary material for: Enhanced dispersibility of metal–organic frameworks (MOFs) in the organic phaseviasurface modification for TFN nanofiltration membrane preparation
Source: Royal Society of Chemistry journal article supplement (doi:10.1039/c9ra09672h), 2020-01-01
Supplement: c9ra09672h1.pdf [file c9ra09672h1.pdf]

## Supplementary information

### Enhanced Dispersibility of Metal-organic Frameworks (MOFs) in Organic Phase via Surface Modification for TFN Nanofiltration Membrane Preparation

Hengrao Liu,<sup>a</sup> Min Zhang,<sup>a</sup> Hao Zhao,<sup>a</sup> Yanjun Jiang,<sup>a</sup> Guanhua Liu<sup>\*ab</sup>

and Jing Gao,<sup>\*a</sup>

<sup>a</sup> *School of Chemical Engineering and Technology, Hebei University of Technology,  
Tianjin 300130, China. E-mail: ghliu@hebut.edu.cn; jgao@hebut.edu.cn*

<sup>b</sup> *Tianjin Key Laboratory of Chemical Process Safety, Hebei University of Technology,  
Tianjin 300130, China*

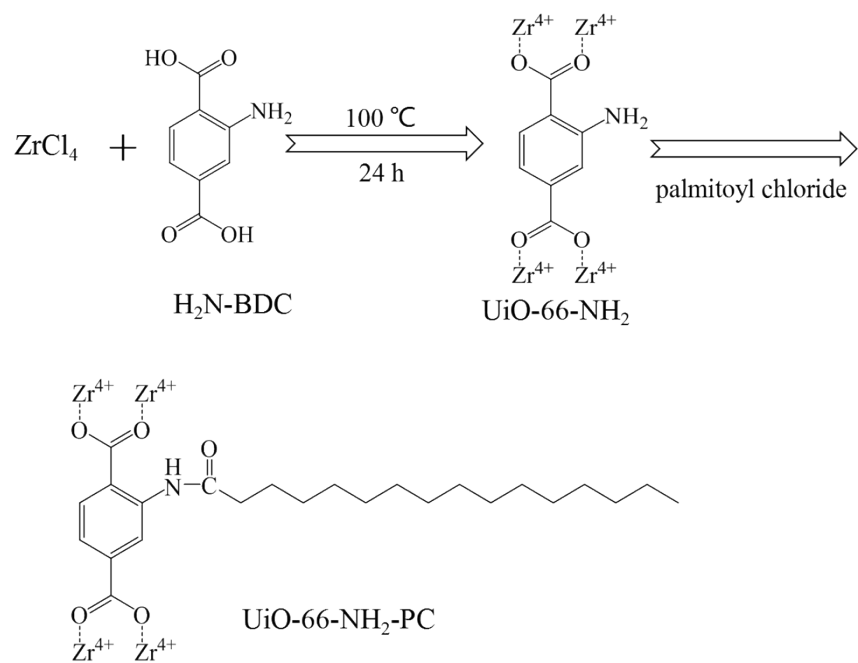

Fig. S1 The modification scheme of UiO-66-NH<sub>2</sub>

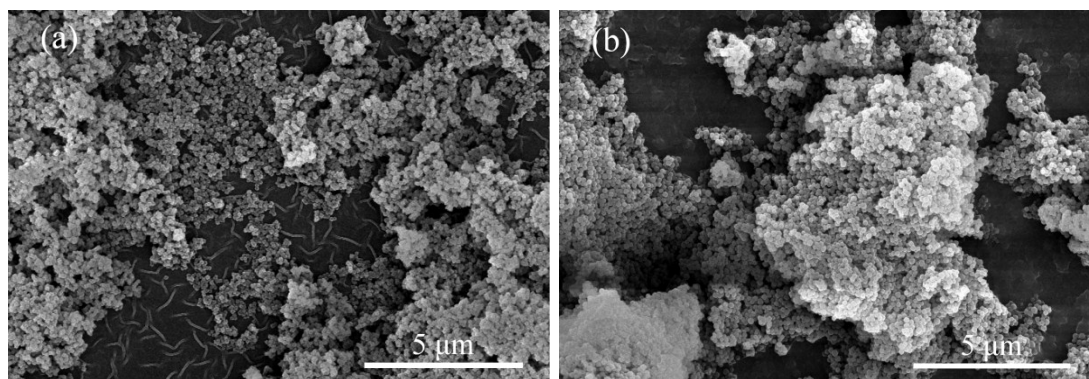

Fig. S2 Surface morphologies of TFN membranes prepared with unmodified UiO-66-NH<sub>2</sub> (a) and UiO-66 (b)

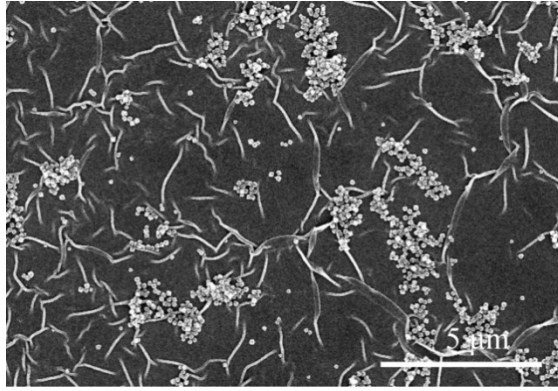

Fig. S3 Surface morphology of TFN-0.10 membrane after 72 h filtration
